# Supplementary material
Source: Springer Nature journal article supplement (https://www.springermedizin.de/resource/supplementary/13012_2014_749_MOESM2_ESM.pdf/9630606)
Supplement: MOESM2 [file 9630606]

# Participants (10-100 teams)

Selection of priority topics and development of mission and goals by research team in collaboration with district

Planning

Introduction of quality improvement methodologies and change topics with Indicators

LS 1

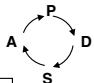

AP1

Introduction of new change topic with Indicators

LS 2

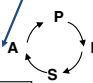

AP2

LS 3

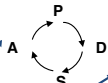

AP3, etc

Dissemination and policy exchange

## Support

Supervision, coaching and mentoring

*LS – Learning Session*

*AP – Action Period*
